# Supplementary material
Source: PubMed Central journal article supplement (PMC2648815)
Supplement: NIHMS91016-supplement-1_si_001.pdf [file NIHMS91016-supplement-1_si_001.pdf]

## Translation of DNA into a Library of 13,000 Synthetic Small-Molecule Macrocycles Suitable for In Vitro Selection

Brian N. Tse, Thomas M. Snyder, Yinghua Shen, David R. Liu\*

### Supporting Information

Amino acids were purchased from Novabiochem, unless otherwise noted. All other solvents and reagents were purchased from Sigma-Aldrich, unless otherwise noted. All reactions were performed at 25 °C, unless otherwise noted.

**Preparation of 5'-Scaffolds With a Side-Chain Amine Tartaramide.** The oligonucleotide-linked CPG beads were transferred to a 1.7 mL tube. The 5' MMT group of the 5'-Amino-5 group was removed using three washes (1 mL each) of 3% trichloroacetic acid in DCM, or until the supernatant was colorless. The relevant diamino acid (Fmoc-Lys(MMT)-OH, Fmoc-Orn(MTT)-OH, Fmoc-Dab(MTT)-OH, or Fmoc-Dpr-(MTT)-OH) was installed by addition of a solution of the amino acid (100  $\mu$ mol), HOBt (100  $\mu$ mol, Novabiochem), HBTU (90  $\mu$ mol, Novabiochem), and DIPEA (200  $\mu$ mol) in 600  $\mu$ L dry DMF, with agitation for 2 h. The resin was then washed with DMF and acetonitrile. The side-chain protecting group (MMT or MTT) was removed using three washes (1 mL each) of 3% (mol %) trichloroacetic acid in DCM, or until the supernatant was colorless. The O,O'-diacetyl-L-tartaric acid monobenzylamide group (see synthesis below) was installed using a solution of the tartaramide (32.3 mg, 100  $\mu$ mol), HOBt (100  $\mu$ mol), HBTU (90  $\mu$ mol), and DIPEA (200  $\mu$ mol) in 600  $\mu$ L dry DMF, with agitation for 2 h. The resin was then washed with DMF and acetonitrile. The product was cleaved and fully deprotected from the resin with AMA at 65 °C for 10 min, dried *in vacuo*, and purified by reverse-phase HPLC using a gradient of acetonitrile (8% to 80%) in 100 mM triethylammonium acetate (TEAA), pH 7.0

**Preparation of 5' Scaffolds With an  $\alpha$ -Amine Tartaramide.** The relevant diamino acid (Fmoc-Lys(MMT)-OH, Fmoc-Orn(MTT)-OH, Fmoc-Dab(MTT)-OH, or Fmoc-Dpr-(MTT)-OH, Novabiochem) was installed on the oligonucleotide as previously described with the side-chain analogs. The  $\alpha$ -amine Fmoc group was removed using three consecutive washes with 20% piperidine/80% DMF (5 min agitation per wash, monitored by UV). The resin was washed with DMF and acetonitrile. The O,O'-diacetyl-L-tartaric acid monobenzylamide group (see synthesis below) was installed using a solution of the tartaramide (32.3 mg, 100  $\mu$ mol), HOBt (100  $\mu$ mol), HBTU (90  $\mu$ mol), and DIPEA (200  $\mu$ mol) in 600  $\mu$ L dry DMF, with agitation for 2 h. The resin was washed with DMF and acetonitrile.

For the Lys, Orn, and Dab scaffolds, the side-chain protecting group (MMT or MTT) was removed using three washes (1 mL each) of 3% (mol %) trichloroacetic acid in DCM, or until the supernatant was colorless. The product was cleaved and fully deprotected from the resin with AMA at 65 °C for 10 min, dried *in vacuo*, and purified by reverse-phase HPLC as described above.

For the Dpr scaffold, positional exchange between the  $\alpha$  amine and side-chain amine was observed for the tartaramide group after on-bead acid treatment (as determined by LC/MS); to avoid this problem, the product was cleaved using AMA at 65 °C with the MTT group intact. The oligonucleotide was then purified by reverse-phase HPLC as previously described, lyophilized, and resuspended in 300  $\mu$ L H<sub>2</sub>O. The MTT group was then cleaved by addition of TFA to 3.5% (v/v) for 15 min. The sample was treated with 50  $\mu$ L 3M NaOAc (pH 5.0) with 20  $\mu$ g of glycogen and precipitated with ethanol to recover the pure product.

**Preparation of Scaffold for Template 5a.** The oligonucleotide CPG resin bearing the 5'-Fmoc-Lys(tartaramide) was prepared as previously described. The Fmoc group was removed from the lysine  $\alpha$ -amine using three consecutive washes with 20% piperidine/80% DMF (5 min agitation per wash). The resin was washed with DMF and acetonitrile. The (D)-phenylalanine was installed by addition of a solution of Fmoc-(D)-Phe-OH (100  $\mu$ mol), HOBt (100  $\mu$ mol), HBTU (90  $\mu$ mol), and DIPEA (200  $\mu$ mol) in 600  $\mu$ L dry DMF, with agitation for 2 h. The resin

was then washed with DMF and acetonitrile. The desired material was cleaved from resin and purified by reverse-phase HPLC as previously described.

**Preparation of Scaffold for Template 6a.** The oligonucleotide CPG resin bearing the 5'-Fmoc-(D)-Phe-Lys(tartaramide) was prepared as previously described (synthesis of **5a**). The Fmoc group was removed from the (D)-phenylalanine  $\alpha$ -amine using three consecutive washes with 20% piperidine/80% DMF (5 min agitation per wash). The resin was washed with DMF and acetonitrile. The 2-furylalanine was installed by addition of a solution of Fmoc-2-furylalanine-OH (100  $\mu$ mol, Peptech), HOBt (100  $\mu$ mol), HBTU (90  $\mu$ mol), and DIPEA (200  $\mu$ mol) in 600  $\mu$ L dry DMF, with agitation for 2 h. The Fmoc group was removed from the 2-furylalanine  $\alpha$ -amine using three consecutive washes with 20% piperidine/80% DMF (5 min agitation per wash, monitored by UV). The resin was washed with DMF and acetonitrile. The desired material was cleaved from resin and purified by reverse-phase HPLC as previously described.

**Synthesis of the O,O'-Diacetyl-L-tartaric acid monobenzylamide.** 2.00 g (9.25 mmol) of (+)-diacetyl-L-tartaric anhydride was dissolved in 25 mL dry DCM in a flame-dried 100 mL roundbottom with a magnetic stir bar. To this, 991 mg (1.01 mL, 9.25 mmol) of benzylamine was added dropwise while stirring; the reaction was stirred under nitrogen for 10 h, producing a solid white precipitate. This precipitate was collected by filtration, washed three times with ~5 mL cold DCM, and dried under vacuum to generate 2.86 g of a white powder (95.6% yield). ESI-MS analysis (positive mode): theoretical = 324.11, observed = 324.1059 $\pm$ 0.3.  $^1$ H-NMR (500 MHz, CDCl<sub>3</sub>):  $\delta$  2.06 (3H, s), 2.18 (3H, d,  $J$  ~ 2.5 Hz), 4.45 (1 H, dd,  $J$  ~ 10.0, 5.0), 4.68 (1 H, dd,  $J$  ~ 6.5, 15.5), 5.68 (1 H, d,  $J$  ~ 3.0), 5.86 (1 H, d,  $J$  ~ 3.0), 6.49 (1 H, t,  $J$  ~ 6.0), 7.29 (2 H, m), 7.34, (1 H, m), 7.37 (2H, m).

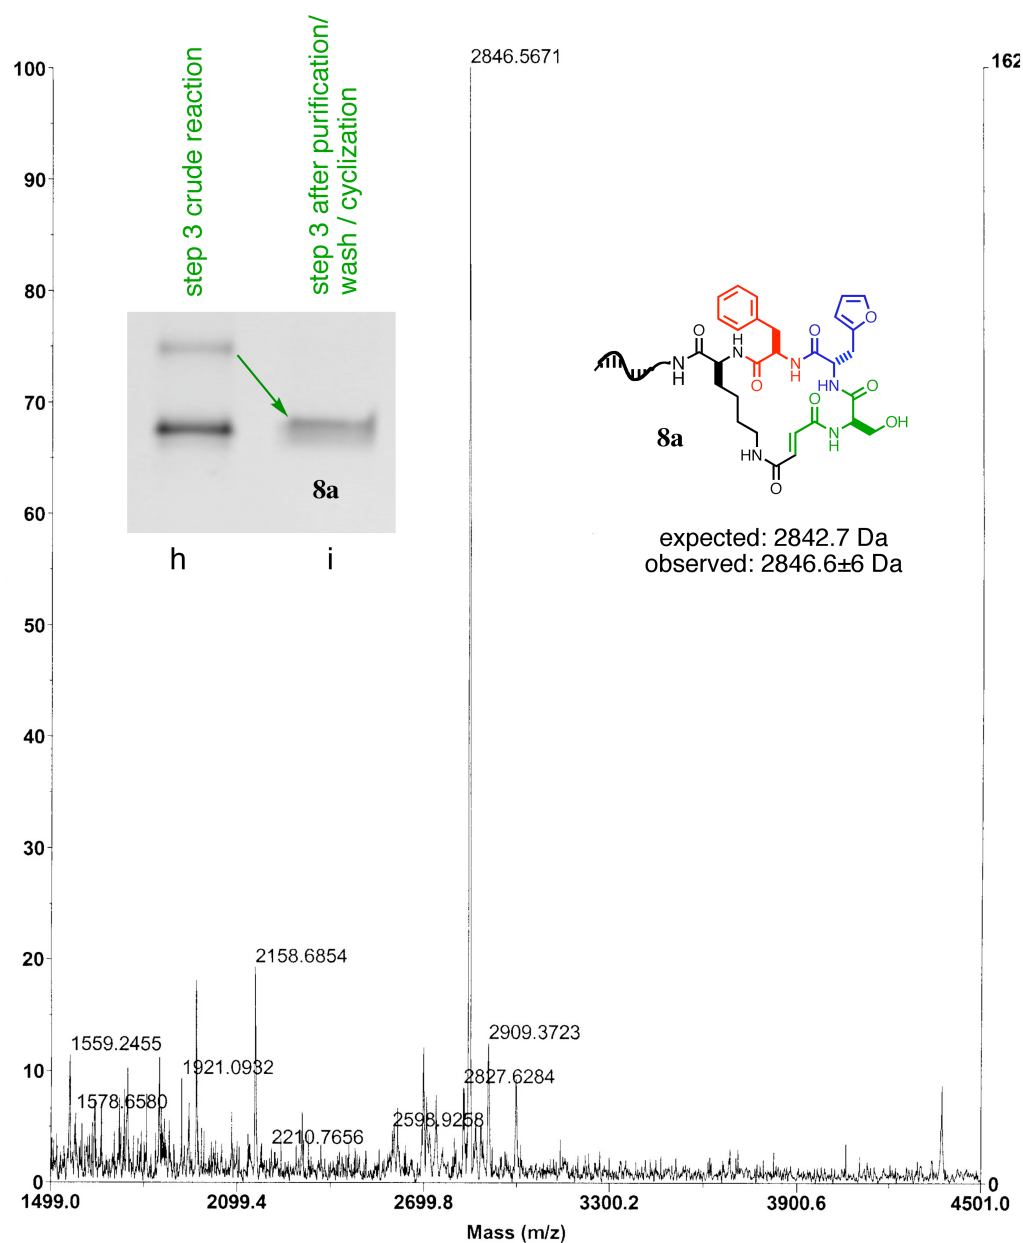

**Figure S1.** Denaturing PAGE and MALDI-TOF analysis of macrocycle **8a**, as synthesized using the capping-based approach (see main text, Figure 3).

| scaffold      | codon   |
|---------------|---------|
| Lys-s         | 5'- AAC |
| Orn-s         | 5'- CTA |
| Dab-s         | 5'- AGA |
| Dpr-s         | 5'- TAC |
| Lys- $\alpha$ | 5'- CAA |
| Orn- $\alpha$ | 5'- TGA |
| Dab- $\alpha$ | 5'- ACA |
| Dpr- $\alpha$ | 5'- GAA |

**Figure S2.** Scaffold codons for template libraries **24**, **26**, and **28**.

| scaffold                   | expected (M-H) | observed ( $\pm 0.1$ Da) | LC retention time (min) |
|----------------------------|----------------|--------------------------|-------------------------|
| <b>1b</b> (Lys-s)          | 742.29         | 742.29                   | 8.78                    |
| <b>14</b> (Orn-s)          | 728.27         | 728.27                   | 8.64                    |
| <b>15</b> (Dab-s)          | 714.26         | 714.25                   | 8.58                    |
| <b>16</b> (Dpr-s)          | 700.24         | 700.24                   | 8.54                    |
| <b>17</b> (Lys- $\alpha$ ) | 742.29         | 742.27                   | 8.75                    |
| <b>18</b> (Orn- $\alpha$ ) | 728.27         | 728.26                   | 8.75                    |
| <b>19</b> (Dab- $\alpha$ ) | 714.26         | 714.25                   | 8.82                    |
| <b>20</b> (Dpr- $\alpha$ ) | 700.24         | 700.24                   | 8.64                    |

**Figure S3.** LC/MS data for the eight template-linked scaffolds after S1 nuclease digestion.

**Masses of Reagents for the Building-Block Compatibility Study** (see main text, Figure 7)

“gly”: glycine (Novabiochem)

“ach”: 1-amino-1-cyclohexyl carboxylic acid (Sigma-Aldrich)

“pro”: proline (Novabiochem)

“sta”: statine (Bachem)

“tml”: *N',N',N'*-trimethyl-lysine (Bachem)

“bdp”: (D)-4-benzoylphenylalanine (Chem-Impex International)

| amino acid | R <sub>1</sub> expected (M-H) | R <sub>1</sub> observed ( $\pm 8$ Da) | R <sub>2</sub> expected (M-H) | R <sub>2</sub> observed ( $\pm 9$ Da) | R <sub>3</sub> expected (M-H) | R <sub>3</sub> observed ( $\pm 9$ Da) |
|------------|-------------------------------|---------------------------------------|-------------------------------|---------------------------------------|-------------------------------|---------------------------------------|
| gly        | 3669.9                        | 3674.3                                | 4220.0                        | 4226.3                                | 4740.0                        | 4747.7                                |
| ach        | 3579.9                        | 3584.2                                | 4140.0                        | 4144.9                                | 4710.1                        | 4717.1                                |
| pro        | 3647.9                        | 3654.1                                | 4208.0                        | 4213.9                                | 4778.1                        | 4785.1                                |
| sta        | 3619.9                        | 3625.9                                | 4180.0                        | 4187.3                                | 4750.1                        | 4757.0                                |
| tml        | 3679.9                        | 3685.0                                | 4240.0                        | 4245.4                                | 4810.1                        | 4817.3                                |
| bdp        | 3694.0                        | 3699.8                                | 4254.1                        | 4260.6                                | 4824.2                        | 4830.3                                |
| control    | 3773.9                        | 3781.1                                | 4334.0                        | 4342.3                                | 4904.1                        | 4909.8                                |

**Figure S4.** MALDI-TOF characterization of the building-block compatibility study DNA-linked reagents.

| codon   | amino acid                                  | commercial source | expected (M-H) | observed ( $\pm 11$ Da) |
|---------|---------------------------------------------|-------------------|----------------|-------------------------|
| 1A      | (D)-phenylalanine                           | Sigma-Aldrich     | 5227.2         | 5226.1                  |
| 1B      | glycine                                     | Novabiochem       | 5128.1         | 5126.4                  |
| 1C      | 5-hydroxytryptophan                         | Novabiochem       | 5295.1         | 5296.8                  |
| 1C (25) | asparagine                                  | Novabiochem       | 5207.1         | 5209.5                  |
| 1D      | norvaline                                   | Novabiochem       | 5152.1         | 5151.6                  |
| 1E      | isoleucine                                  | Novabiochem       | 5184.1         | 5186.7                  |
| 1F      | isoglutamine                                | Novabiochem       | 5190.1         | 5190.7                  |
| 1G      | 3-(2-thienyl)-alanine                       | Sigma-Aldrich     | 5215.0         | 5221.3                  |
| 1H      | statine                                     | Bachem            | 5228.1         | 5229.8                  |
| 1I      | (O <sub>2</sub> )-methionine                | Bachem            | 5216.0         | 5216.2                  |
| 1J      | 4-nitrophenylalanine                        | Bachem            | 5263.1         | 5267.5                  |
| 1K      | N <sup>1</sup> -pyrazinylcarbonyl-ornithine | Bachem            | 5282.1         | 5282.3                  |
| 1L      | (D)-4-benzoylphenylalanine                  | Chem-Impex-Intl.  | 5322.1         | 5321.6                  |

**Figure S5.** MALDI-TOF characterization for the step 1 DNA-linked reagents.

| codon   | amino acid                                                   | commercial source | expected (M-H) | observed ( $\pm 11$ Da) |
|---------|--------------------------------------------------------------|-------------------|----------------|-------------------------|
| 2A      | 2-furylalanine                                               | Peptech           | 5168.1         | 5170.7                  |
| 2B      | $\beta$ -alanine                                             | Sigma-Aldrich     | 5102.1         | 5101.7                  |
| 2B      | proline                                                      | Novabiochem       | 5137.2         | 5137.9                  |
| 2D      | threonine                                                    | Novabiochem       | 5141.1         | 5140.9                  |
| 2E      | 4- <i>trans</i> -hydroxyproline                              | Novabiochem       | 5153.2         | 5156.2                  |
| 2F      | $\beta$ -(3-pyridyl)-alanine                                 | Bachem            | 5179.2         | 5180.0                  |
| 2G      | <i>N</i> -methyl-phenylalanine                               | Sigma-Aldrich     | 5192.1         | 5193.7                  |
| 2G (25) | phenylglycine                                                | Novabiochem       | 5165.1         | 5169.8                  |
| 2H      | $\beta$ -cyclohexylalanine                                   | Bachem            | 5193.2         | 5196.6                  |
| 2I      | citrulline                                                   | Novabiochem       | 5179.1         | 5178.9                  |
| 2J      | <i>N,N,N'</i> -trimethyllysine                               | Bachem            | 5220.1         | 5223.2                  |
| 2K      | (D)-tryptophan                                               | Sigma-Aldrich     | 5217.1         | 5219.6                  |
| 2L      | ( <i>R</i> )-3-amino-3-(2,3-dimethoxy phenyl)-propionic acid | CSPS              | 5238.1         | 5239.7                  |

**Figure S6.** MALDI-TOF characterization of the step 2 DNA-linked reagents.

| codon   | amino acid                      | commercial source | expected (M-H) | observed ( $\pm 11$ Da) |
|---------|---------------------------------|-------------------|----------------|-------------------------|
| 3A      | (D)-serine                      | Sigma-Aldrich     | 5742.1         | 5745.0                  |
| 3B      | sarcosine                       | Novabiochem       | 5668.2         | 5665.4                  |
| 3C      | 2-amino-4-pentenoic acid        | Sigma-Aldrich     | 5654.2         | 5658.1                  |
| 3D      | 4-amino-2-hydroxybutyric acid   | Bachem            | 5667.2         | 5665.6                  |
| 3E      | $\beta$ -cyclopropyl alanine    | Bachem            | 5708.2         | 5711.3                  |
| 3F      | glutamine                       | Sigma-Aldrich     | 5734.2         | 5734.6                  |
| 3G      | <i>threo-tert</i> -butyl serine | Acros             | 5658.2         | 5657.4                  |
| 3G (32) | homoserine                      | Novabiochem       | 5700.2         | 5702.5                  |
| 3H      | arginine                        | Novabiochem       | 5713.2         | 5715.6                  |
| 3I      | $\beta$ -phenylalanine          | CSPS              | 5758.2         | 5757.5                  |
| 3J      | styrylalanine                   | Peptech           | 5810.2         | 5810.0                  |
| 3K      | cyclohexylstatine               | Bachem            | 5803.3         | 5804.6                  |
| 3L      | 4-phosphonomethylphenylalanine  | CSPS              | 5845.2         | 5847.6                  |

**Figure S7.** MALDI-TOF characterization of the step 3 DNA-linked reagents.

| codon | amino acid                     | expected (M-H) | observed ( $\pm 0.1$ Da) |
|-------|--------------------------------|----------------|--------------------------|
| 1A    | (D)-phenylalanine              | 972.35         | 972.36                   |
| 1B    | glycine                        | 882.30         | 882.30                   |
| 1C    | 5-hydroxytryptophan            | 1027.36        | not observed             |
| 1D    | norvaline                      | 924.35         | 924.35                   |
| 1E    | isoleucine                     | 938.38         | 938.38                   |
| 1F    | isoglutamine                   | 953.34         | 953.34                   |
| 1G    | 3-(2-thienyl)-alanine          | 978.31         | 978.32                   |
| 1H    | statine                        | 982.39         | 982.40                   |
| 1I    | (O <sub>2</sub> )-methionine   | 988.31         | 988.31                   |
| 1J    | 4-nitrophenylalanine           | 1017.34        | 1017.35                  |
| 1K    | N'-pyrazinylcarbonyl-ornithine | 1045.38        | 1045.36                  |
| 1L    | (D)-4-benzoylphenylalanine     | 1076.38        | 1076.40                  |

**Figure S8.** LC/MS data for macrocycle library **21** (12x1x1).

| codon | amino acid                                                   | expected (M-H) | observed ( $\pm 0.1$ Da) |
|-------|--------------------------------------------------------------|----------------|--------------------------|
| 2A    | 2-furylalanine                                               | 972.35         | 972.36                   |
| 2B    | $\beta$ -alanine                                             | 906.34         | 906.36                   |
| 2C    | proline                                                      | 932.36         | 932.36                   |
| 2D    | threonine                                                    | 936.35         | 936.37                   |
| 2E    | 4- <i>trans</i> -hydroxyproline                              | 948.35         | 948.38                   |
| 2F    | $\beta$ -(3-pyridyl)-alanine                                 | 983.37         | 983.40                   |
| 2G    | N-methyl-phenylalanine                                       | 996.39         | not observed             |
| 2H    | $\beta$ -cyclohexylalanine                                   | 988.42         | 988.43                   |
| 2I    | citrulline                                                   | 992.39         | 992.40                   |
| 2J    | N',N',N'-trimethyllysine                                     | 1005.44        | 1005.46                  |
| 2K    | (D)-tryptophan                                               | 1021.38        | 1021.38                  |
| 2L    | ( <i>R</i> )-3-amino-3-(2,3-dimethoxy phenyl)-propionic acid | 1042.39        | 1042.39                  |

**Figure S9.** LC/MS data for macrocycle library **22** (1x12x1).

| codon | amino acid                      | expected<br>(M-H) | observed<br>( $\pm 0.1$ Da) |
|-------|---------------------------------|-------------------|-----------------------------|
| 3A    | (D)-serine                      | 972.35            | 972.35                      |
| 3B    | sarcosine                       | 956.35            | 956.36                      |
| 3C    | 2-amino-4-pentenoic acid        | 982.37            | 982.37                      |
| 3D    | 4-amino-2-hydroxybutyric acid   | 986.37            | 986.37                      |
| 3E    | $\beta$ -cyclopropyl alanine    | 996.39            | 996.40                      |
| 3F    | glutamine                       | 1013.38           | 1013.40                     |
| 3G    | <i>threo-tert</i> -butyl serine | 1028.41           | 1028.41                     |
| 3H    | arginine                        | 1041.42           | 1041.45                     |
| 3I    | $\beta$ -phenylalanine          | 1046.40           | 1046.45                     |
| 3J    | styrylalanine                   | 1058.40           | 1058.41                     |
| 3K    | cyclohexylstatine               | 1082.46           | 1082.47                     |
| 3L    | 4-phosphonomethylphenylalanine  | 1126.37           | 1126.40                     |

**Figure S10.** LC/MS data for macrocycle library **23** (1x1x12).

**Complete Ref. 60:**

(60) Woodward, R. B.; Logusch, E.; Nambiar, K. P.; Sakan, K.; Ward, D. E.; Au-Yeung, B.-W.; Balaram, P.; Browne, L. J.; Card, P. J.; Chen, C. H.; Chevert, R. B.; Fliri, A.; Frobel, K.; Gais, H.-J.; Garratt, D. G.; Hayakawa, K.; Heggie, W.; Hesson, D. P.; Hoppe, D.; Hoppe, I.; Hyatt, J. A.; Ikeda, D.; Jacobi, P. A.; Kim, K. S.; Kobuke, Y.; Kojima, K.; Krowicki, K.; Lee, V. J.; Leutert, T.; Malchenko, S.; Martens, J.; Matthews, R. S.; Ong, B. S.; Press, J. B.; Rajan Babu, T. V.; Rousseau, G.; Sauter, H. M.; Suzuki, M.; Tatsuta, K.; Tolbert, L. M.; Truesdale, E. A.; Uchida, I.; Ueda, Y.; Uyehara, T.; Vasella, A. T.; Vladuchick, W. C.; Wade, P. A.; Williams, R. M.; Wong, H. N.-C. *J Am Chem Soc* **1981**, *103*, 3213-3215.
